# Supplementary material for: Mass Spectrometry-Based De Novo Sequencing of Monoclonal Antibodies Using Multiple Proteases and a Dual Fragmentation Scheme
Source: PubMed Central journal article supplement — J Proteome Res. 2021 Jun 14;20(7):3559–66. doi: 10.1021/acs.jproteome.1c00169 (PMC8256418; doi:10.1021/acs.jproteome.1c00169), 2021-06-14
Supplement: pr1c00169_si_001.pdf [file pr1c00169_si_001.pdf]

Supplementary Information to:

**Mass spectrometry-based *de novo* sequencing of monoclonal antibodies using multiple proteases and a dual fragmentation scheme**

**Authors:**

Weiwei Peng<sup>1#</sup>, Matti F. Pronker<sup>1#</sup>, Joost Snijder<sup>1\*</sup>

#equal contribution

\*corresponding author: [j.snijder@uu.nl](mailto:j.snijder@uu.nl)

**Affiliation:**

<sup>1</sup> Biomolecular Mass Spectrometry and Proteomics, Bijvoet Center for Biomolecular Research and Utrecht Institute of Pharmaceutical Sciences, Utrecht University, Padualaan 8, 3584 CH Utrecht, The Netherlands

**Contents:**

anti-FLAG-M2 MS-based sequences in FASTA format

Table S1. Coverage statistics for the Herceptin benchmark and anti-FLAG<sup>TM</sup>-M2 MAb sequences.

Table S2. Model statistics for Fab crystal structure.

Table S3. Comparison of CDR sequences of FLAG<sup>TM</sup>-tag binding MAbs.

Figure S1. Coverage maps of anti-FLAG<sup>TM</sup>-M2 MAb sequences.

Figure S2. Depth of coverage profiles for Herceptin and anti-FLAG<sup>TM</sup>-M2 sequences

Figure S3. Sequence accuracy of Herceptin by fragmentation type and protease

Figure S4. Herceptin peptide length distribution by digestion time

Figure S5. Isoleucine/Leucine assignment at Heavy Chain position 51 of anti-FLAG<sup>TM</sup>-M2.

Figure S6. Electrostatic surface potential of the anti-FLAG<sup>TM</sup>-M2 paratope.

Figure S7. Western blot validation of synthetic recombinant anti-FLAG<sup>TM</sup>-M2

**anti-FLAG-M2 MS-based sequence (with L51I correction)**

>anti-FLAG-M2\_MS\_HeavyChain

QVQLQQSAAELARPGASVKMSCKASGYSFTTYTIHWVKQRPGQGLEWIGYINPSSGYAAYNQNFKDETTLTADPSSS  
TAYMELNSLTSEDSAVYYCAREKFYGYDYWGQGATLTVSSAKTTPPSVYPLAPGSAAQTNSMVTLGCLVKGYFPEPV  
TVTWNSGSLSSGVHTFPAVLQSDLYTLSSSVTPSSRPSETVTCNVAHPASSTKVDKKIVPRDCGCKPCICTVPEV  
SSVFIFPPKPKDVLITITLTPKVTCVVWDISKDDPEVQFSWFVDDVEVHTAQTQPREEQFNSTFRSVSELPIMHQDWL  
NGKEFKCRVNSAAFPAPIEKTISKTKGRPKAPQVYTIPPPKEQMAKDKVSLTCMITDFFPEDITVEWQWNGQPAENY  
KNTQPIMNTNGSYFVYSKLVNQKSNWEAGNTFTCSVLHEGLHNHHTKSLSHSPGK

>anti-FLAG-M2\_MS\_LightChain

DVLMTQIPLSLPVSLGDQASISCRSSQSIVHRNGNTYLEWYLLKPGQSPKLLIYKVSNRFSGVPDRFSGSGSGTDFT  
LKISRVEAEDLGVYYCFQGSHPYTFGGGTKLEIRRADAAPTIVSIFPPSSEQLTSGGASVVCFLNNFYPKDINVKWK  
IDGSERQNGVLNSWTDQDSKDYMSSTLTTLTKDEYERHNSYTCETHKTSTSPIVKSFNREK

**Table S1.** Coverage statistics for the Herceptin benchmark and anti-FLAG™-M2 MAb sequences.

|                                                |             | Herceptin     | anti-FLAG-M2  |
|------------------------------------------------|-------------|---------------|---------------|
| <b># peptide reads</b><br>(Byonic score >=500) | total       | 4408          | 3371          |
|                                                | stepped HCD | 2686          | 1983          |
|                                                | EThcD       | 1722          | 1388          |
| total                                          |             | 148 [8-394]   | 84 [0-382]    |
| <b>depth-of-coverage</b><br>(median [range])   | CDRH1       | 163 [158-176] | 32 [22-47]    |
|                                                | CDRH2       | 94 [88-103]   | 39 [36-43]    |
|                                                | CDRH3       | 42 [18-67]    | 66 [50-75]    |
|                                                | CDRL1       | 210 [208-218] | 192 [144-207] |
|                                                | CDRL2       | 74 [71-84]    | 46 [40-60]    |
|                                                | CDRL3       | 140 [130-143] | 127 [109-131] |

**Table S2.** Model statistics for Fab crystal structure.

| <b>Refinement statistics</b>                            |                   |                   |
|---------------------------------------------------------|-------------------|-------------------|
| Resolution (Å)                                          | 42.52-1.86        |                   |
| No. of reflections                                      | 39988             |                   |
| <b>PDB</b>                                              | <b>2G60 (old)</b> | <b>7BG1 (new)</b> |
| Total number of atoms                                   | 3518              | 3497              |
| Average atomic displacement parameter (Å <sup>2</sup> ) | 45.0              | 52.0              |
| $R_{\text{work}}/R_{\text{free}}$                       | 0.235/0.278       | 0.217/0.255       |
| Bond length RMSZ                                        | 0.93              | 0.28              |
| Bond angle RMSZ                                         | 0.96              | 0.51              |
| Ramachandran favored/outliers (%)                       | 93.0/1.0          | 97.57/0.24        |
| Molprobit score                                         | 3.37              | 1.60              |
| Clashscore                                              | 56                | 3.61              |

**Table S3.** Comparison of CDR sequences from anti-FLAG™-M2 to other known FLAG™-tag binding MAbs (see refs 41-42).

| <b>Heavy Chain</b> |              |              |               |
|--------------------|--------------|--------------|---------------|
| <b>MAb</b>         | <b>CDRH1</b> | <b>CDRH2</b> | <b>CDRH3</b>  |
| anti-FLAG-M2       | GYSFTTYT---- | LNPSSGYA     | AREKFYGYDY    |
| 2H8                | GFSLNTSGRS-- | IYWDDDK      | ARRMDY        |
| EEh13.6            | GDSLSSFNAGVN | HGAVM-STR    | AKSTGRYDF     |
| EEh14.3            | GDSLSSYNAGVN | HMAGV-STR    | VRNEWSGAF     |
| EEf15.4            | GFSIK--GANVN | HVRGDASTR    | ADRMYSFYSGGEA |

  

| <b>Light Chain</b> |              |              |              |
|--------------------|--------------|--------------|--------------|
| <b>MAb</b>         | <b>CDRL1</b> | <b>CDRL2</b> | <b>CDRL3</b> |
| anti-FLAG-M2       | QSIVHRNGNTY  | KVS          | FQGSHVPYT    |
| 2H8                | QSLVHSNGNTY  | KVS          | SQSTHVPYT    |
| EEh13.6            | QSIVHSNGNTY  | KVS          | FQGS LVPPT   |
| EEh14.3            | QSIVHSNGNTY  | KVS          | FQGS LVPPT   |
| EEf15.4            | NARSGS       | DGN          | SAFDQTNKYVG  |

A) Herceptin

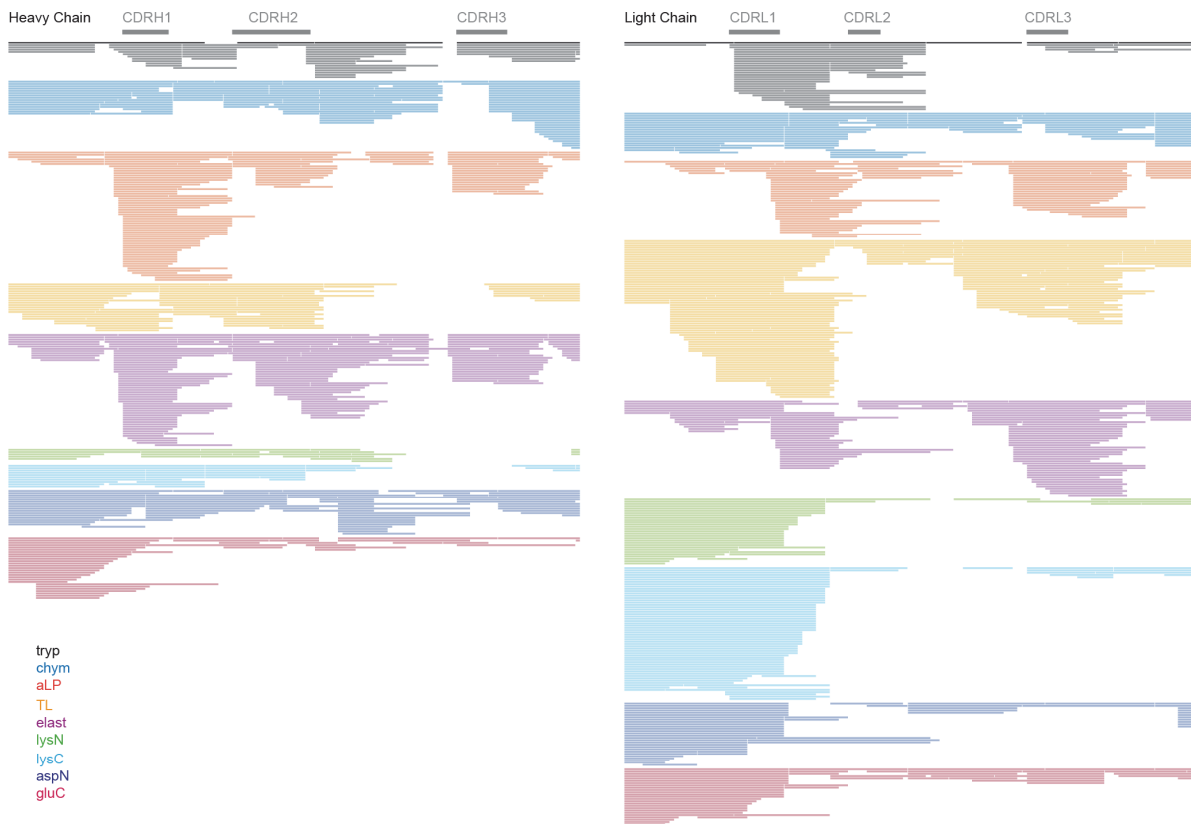

B) anti-FLAG-M2

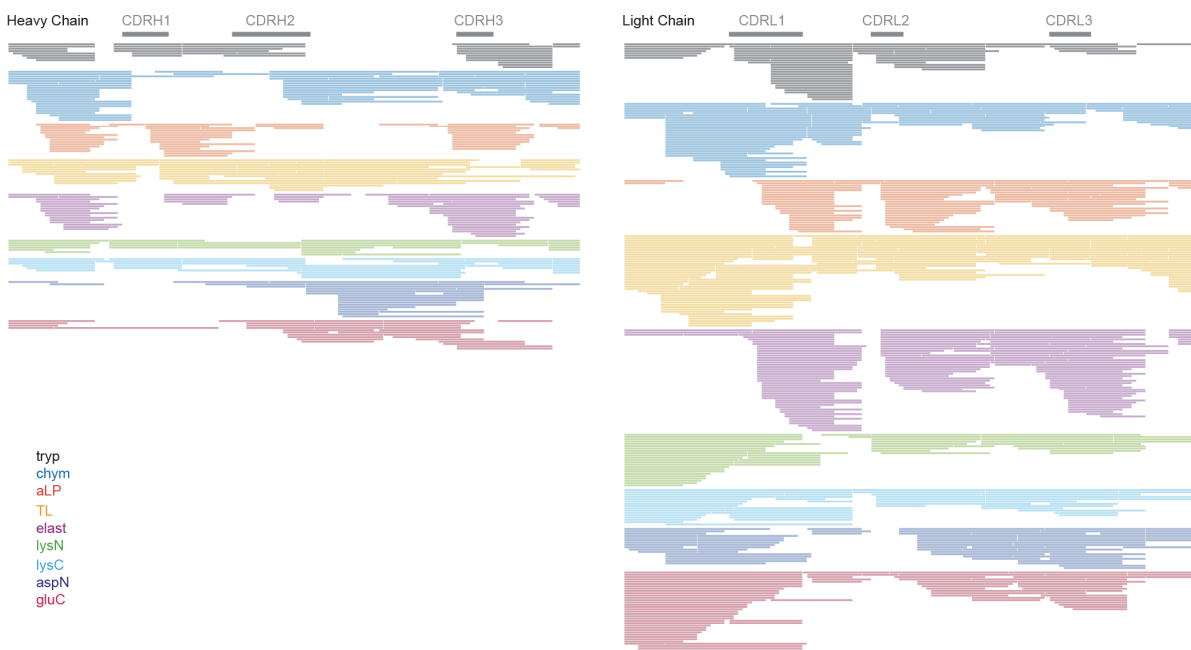

**Figure S1.** Coverage maps of Herceptin benchmark (A) and anti-FLAG™-M2 MAb (B) sequences. Peptides with Byonic scores of  $\geq 500$  are shown.

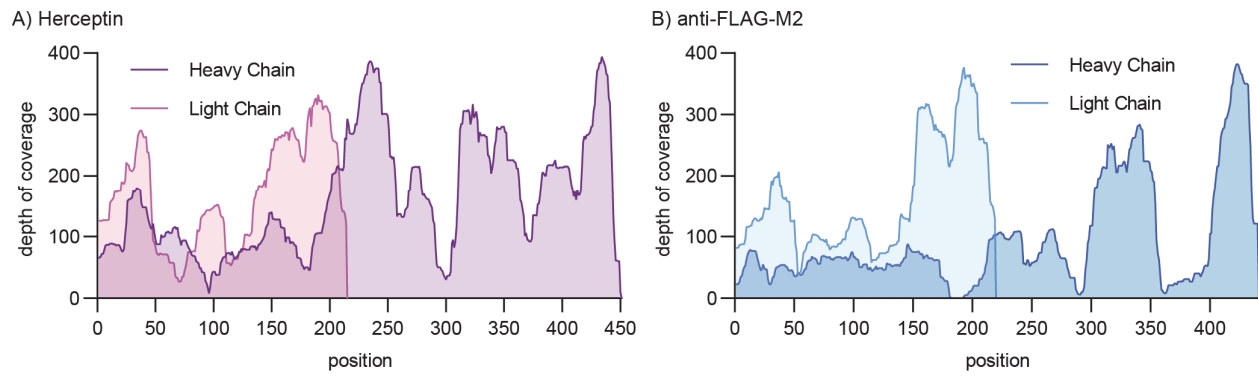

**Figure S2.** Depth of coverage profiles for Herceptin (A) and anti-FLAG™-M2 (B) sequences, based on peptides with Byonic score  $\geq 500$ , as in Figure S1.

### A) Fragmentation method

Heavy Chain

| sample          | errors | sequence                                                                                                                      | CDRH1 | CDRH2 | CDRH3 |
|-----------------|--------|-------------------------------------------------------------------------------------------------------------------------------|-------|-------|-------|
| Herceptin (ref) | -/120  | EVQLVESGGGLVQPGGSLRLSCAASGFNIKDTYIHWVRQAPGKGLLEWVARLYPTNGYTRYADSVKGRFTISADTSKNTAYLQMNSLRAEDTAVYVY---CSRWGGDGFYAMDYWGQGLTIVTSS |       |       |       |
| sHCD            | 6/123  | EVQLVESGGGLVQPGGSLRLSCAASGFNIKDTYIHWVRQAPGKGLLEWVARLYPTNGYTRYADSVKGRFTISADTSKNTAYLQMNSLRAEDTAVYVY---CSRWGGDGFYAMDYWGQGLTIVTSS |       |       |       |
| EThcD           | 3/123  | EVQLVESGGGLVQPGGSLRLSCAASGFNIKDTYIHWVRQAPGKGLLEWVARLYPTNGYTRYADSVKGRFTISADTSKNTAYLQMNSLRAEDTAVYVY---CSRWGGDGFYAMDYWGQGLTIVTSS |       |       |       |
| sHCD+EThcD      | 0/120  | EVQLVESGGGLVQPGGSLRLSCAASGFNIKDTYIHWVRQAPGKGLLEWVARLYPTNGYTRYADSVKGRFTISADTSKNTAYLQMNSLRAEDTAVYVY---CSRWGGDGFYAMDYWGQGLTIVTSS |       |       |       |

Light Chain

| sample          | errors | sequence                                                                                                       | CDRL1 | CDRL2 | CDRL3 |
|-----------------|--------|----------------------------------------------------------------------------------------------------------------|-------|-------|-------|
| Herceptin (ref) | -/110  | DIQMTQSPSSLSASVGDRTVITCRAS-QDVNTAVAWYQQKPGKAPKLLIYSASFVLYSGVPSRFSGSRSGDFTLTISSLQPEDFATYYCQQHYTTPPTFGQGTKEIKRTV |       |       |       |
| sHCD            | 16/110 | EVQMTQSPSSLSASVGDRTVITCRAS-QDVNTAVAWYQQKPGKAPKLLIYSASFVLYSGVPSRFSGSRSGDFTLTISSLQPEDFATYYCQQHYTTPPTFGQGTKEIKRTV |       |       |       |
| EThcd           | 7/110  | EVQMTQSPSSLSASVGDRTVITCRAS-QDVNTAVAWYQQKPGKAPKLLIYSASFVLYSGVPSRFSGSRSGDFTLTISSLQPEDFATYYCQQHYTTPPTFGQGTKEIKRTV |       |       |       |
| sHCD+EThcD      | 3/110  | DIQMTQSPSSLSASVGDRTVITCRAS-QDVNTAVAWYQQKPGKAPKLLIYSASFVLYSGVPSRFSGSRSGDFTLTISSLQPEDFATYYCQQHYTTPPTFGQGTKEIKRTV |       |       |       |

### B) Proteases

Heavy Chain

| sample          | errors | sequence                                                                                                                         | CDRH1 | CDRH2 | CDRH3 |
|-----------------|--------|----------------------------------------------------------------------------------------------------------------------------------|-------|-------|-------|
| Herceptin (ref) | -/120  | EVQLVESGGGLVQPGGSLRLSCAASGFNIKDTYIHWVRQAPGKGLLEWVARLYPTNGYTRYADSVKGRFTISADTSKNTAYLQMNSLRAEDTAVYVY---CSR---WGGDGFYAMDYWGQGLTIVTSS |       |       |       |
| Trypsin         | 24/120 | EVQLVESG--LNKKD----FDAASGFNIKDTYIHWVRQAPGKGLLEWVARLYPTNGYTRYADSVKGRFTISADTSKNTAYLQMNSLRAEDTAVYVY---CHEVGGW-GDGFYMSDYWGQGLTIVTSS  |       |       |       |
| Thermolysin     | 41/120 | EVQLVESGGGLVQPGGSLRLSCAASGFNIKDTYL-WH-----VARYPTNGYTRYADSVKGRFTLSADTSKNTAYLQMNSLR-----AMDYWG-GRWIVTSS                            |       |       |       |
| 4 proteases     | 3/123  | EVQLVESGGGLVQPGGSLRLSCAASGFNIKDTYIHWVRQAPGKGLLEWVARLYPTNGYTRYADSVKGRFTISADTSKNTAYLQMNSLRAEDTAVYVY---CSR---WGGDGFYAMDYWGQGLTIVTSS |       |       |       |
| 9 proteases     | 0/120  | EVQLVESGGGLVQPGGSLRLSCAASGFNIKDTYIHWVRQAPGKGLLEWVARLYPTNGYTRYADSVKGRFTISADTSKNTAYLQMNSLRAEDTAVYVY---CSR---WGGDGFYAMDYWGQGLTIVTSS |       |       |       |

Light Chain

| sample          | errors | sequence                                                                                                         | CDRL1 | CDRL2 | CDRL3 |
|-----------------|--------|------------------------------------------------------------------------------------------------------------------|-------|-------|-------|
| Herceptin (ref) | -/110  | DIQMTQSPSSLSASVGDRTVITCR-AS-QDVNTAVAWYQQKPGKAPKLLIYSASFVLYSGVPSRFSGSRSGDFTLTISSLQPEDFATYYC-QQHYTTPPTFGQGTKEIKRTV |       |       |       |
| Trypsin         | 1/110  | DIQMTQSPSSLSASVGDRTVITCR-AS-QDVNTAVAWYQQKPGKAPKLLIYSASFVLYSGVPSRFSGSRSGDFTLTISSLQPEDFATYYC-QQHYTTPPTFGQGTKEIKRTV |       |       |       |
| Thermolysin     | 13/113 | DIQMTQSPSSLSASVGDRTVITCR-AS-QDVNTAVAWYQQKPGKAPKLLIYSASFVLYSGVPSRFSGSRSGDFTLTISSLQPEDFATYYC-QQHYTTPPTFGQGTKEIKRTV |       |       |       |
| 4 proteases     | 5/110  | EVQMTQSPSSLSASVGDRTVITCR-TG-QDVNTAVAWYQQKPGKAPKLLIYSASFVLYSGVPSRFSGSRSGDFTLTISSLQPEDFATYYC-QQHYTTPPTFGQGTKEIKRTV |       |       |       |
| 9 proteases     | 3/110  | DIQMTQSPSSLSASVGDRTVITCR-AS-QDVNTAVAWYQQKPGKAPKLLIYSASFVLYSGVPSRFSGSRSGDFTLTISSLQPEDFATYYC-QQHYTTPPTFGQGTKEIKRTV |       |       |       |

### C)

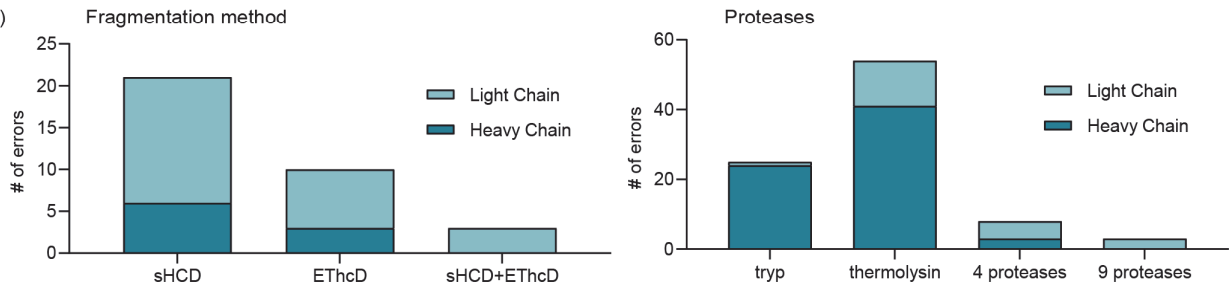

**Figure S3.** Sequence accuracy of Herceptin by fragmentation type (A) and use of proteases (B). Supernovo analysis was performed using only the specified fragmentation type or proteases as input data. Resulting sequences were aligned to the Herceptin reference sequences to count the number of errors. Every substitution, insertion or deletion was counted as an error as listed before the output sequence; *i.e.* all positions labeled in purple and marked with an asterisks are counted. The ‘4 proteases’ dataset consists of trypsin, chymotrypsin, thermolysin and elastase. The total number of errors is shown for fragmentation strategy and protease datasets in panel C.



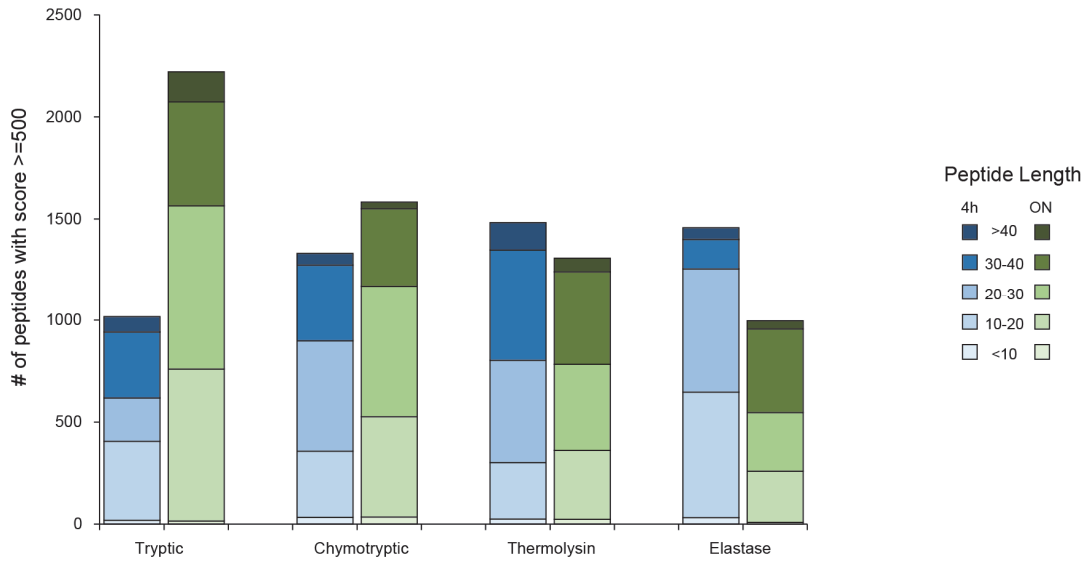

Heavy Chain

| sample          | errors | sequence                                                                                                                 | CDRH1 | CDRH2 | CDRH3 |
|-----------------|--------|--------------------------------------------------------------------------------------------------------------------------|-------|-------|-------|
| Herceptin (ref) | -/120  | EVQLVESGGGLVQPGGSLRLSCAASGFNIKDTYIHWVRQAPGKLEWARIYPTNGYTRYADSVKGRFTISADTSKNTAYLQMNSLRAEDTAVYY--CSRWGGDGFYAMDYWGQGLVTVSS  |       |       |       |
| 4 hours         | 3/123  | EVQLVESGGGLVQPGGSLRLSCAASGFNIKDTYIHWVRQAPGKLEWARIYPTNGYTRYADSVKGRFTISADTSKNTAYLQMNSLRAEDTAVYYCMKCSRWGGDGFYAMDYWGQGLVTVSS |       |       |       |
| overnight       | 0/120  | EVQLVESGGGLVQPGGSLRLSCAASGFNIKDTYIHWVRQAPGKLEWARIYPTNGYTRYADSVKGRFTISADTSKNTAYLQMNSLRAEDTAVYY--CSRWGGDGFYAMDYWGQGLVTVSS  |       |       | ***   |

Light Chain

| sample          | errors | sequence                                                                                                       | CDRL1 | CDRL2 | CDRL3 |
|-----------------|--------|----------------------------------------------------------------------------------------------------------------|-------|-------|-------|
| Herceptin (ref) | -/110  | DI-QMTQSPSSLSASVGDRTVITCRASQDVNTAVAWYQQKPKGAPKLLIYSASFLYSGVPSRFSGSRSGTDFTLTSSLQPEDFATYYCQQHYTTPPTFGQGTKVEIKRTV |       |       |       |
| 4 hours         | 5/110  | EV-QMTQSPSSLSASVGDRTVITCRTGQDVNTAVAWYQQKPKGAPKLLIYSASFLYSGVPSRFSGSRSGTDFTLTSSLQPEDFATYYCQQHYTTPPTFGQGTKVEIKRTV |       |       |       |
| overnight       | 2/111  | DIDQMTQSPSSLSASVGDRTVITCRASQDVNTAVAWYQQKPKGAPKLLIYSASFLYSGVPSRFSGSRSGTDFTLTSSLQPENFATYYCQQHYTTPPTFGQGTKVEIKRTV | **    | *     | *     |

**Figure S4.** Peptide length depending on digestion time. Datasets of four proteases were combined for Supernovo analysis. Peptide length distribution is based on peptides with score  $\geq 500$ . Resulting sequences from Supernovo were aligned to the Herceptin reference sequences to count the number of errors. Every substitution, insertion or deletion was counted as an error as listed before the output sequence; *i.e.* all positions labeled in purple and marked with an asterisks are counted.

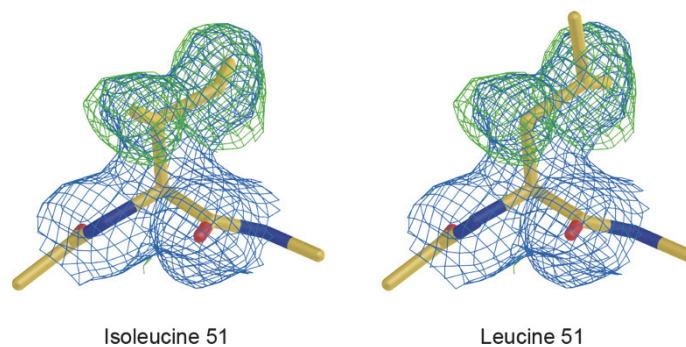

**Figure S5.** Isoleucine/Leucine assignment at Heavy Chain position 51 of anti-FLAG™-M2. (left panel) Electron density around isoleucine 51 at a contour level of 1.0 RMSD in blue and simulated annealing omit map density of the C<sub>γ1</sub>, C<sub>γ2</sub> and C<sub>δ</sub> atoms of this residue at a contour level of 2.5 R.M.S.D. in green. (right panel) A leucine instead of an isoleucine in this location has a poor fit to both maps.

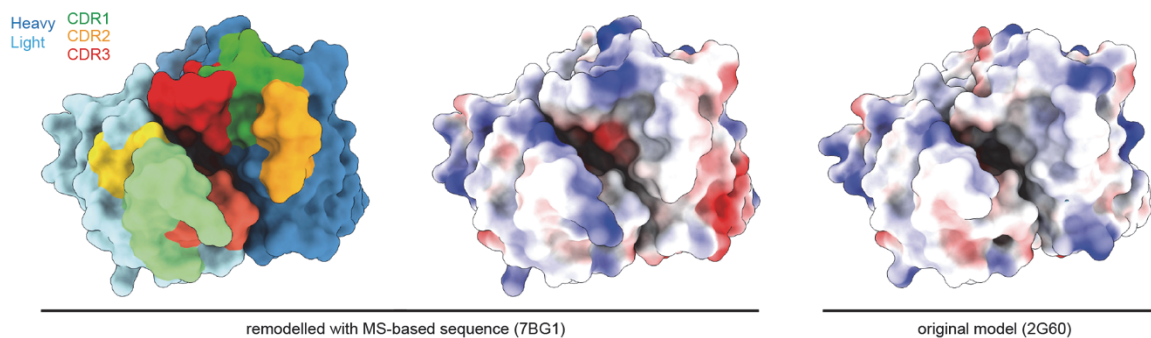

**Figure S6.** Electrostatic surface potential of the anti-FLAG<sup>TM</sup>-M2 paratope. The revised crystal structure based on the MS-derived sequence (PDB ID: 7BG1) is shown alongside the original model (PDB ID: 2G60). The electrostatic surface was calculated with the default *coulombic* command in ChimeraX.

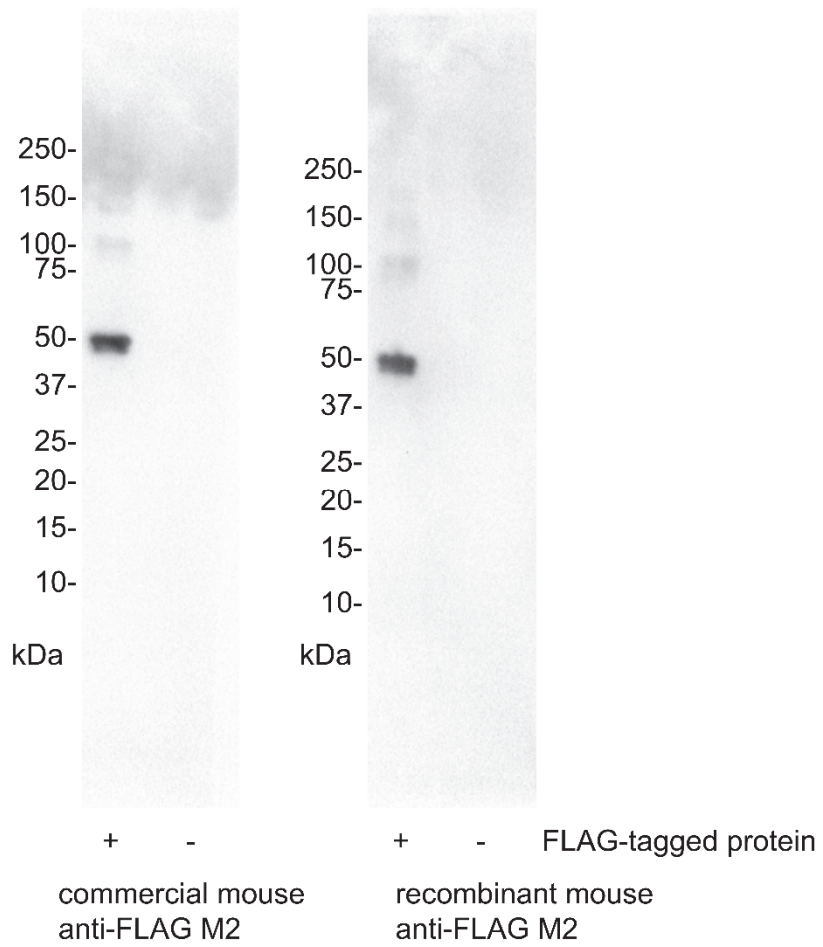

**Figure S7.** Western blot validation of synthetic recombinant anti-FLAG™-M2 compared to the originally sequenced sample. Same Western blot as shown in Figure 3C, showing complete lanes with marker positions.
